# Supplementary material for: A base-free synthetic route to anti-bimetallic lanthanide pentalene complexes
Source: Royal Society of Chemistry journal article supplement (doi:10.1039/c6dt04475a), 2016-12-22
Supplement: c6dt04475a1.pdf [file c6dt04475a1.pdf]

ELECTRONIC SUPPORTING INFORMATION

**A Base-Free Synthetic Route to Anti-Bimetallic Lanthanide  
Pentalene Complexes.**

Alexander F. R. Kilpatrick<sup>‡</sup> and F. Geoffrey N. Cloke<sup>\*‡</sup>.

<sup>‡</sup> Department of Chemistry, School of Life Sciences, University of Sussex, Brighton,  
BN1 9QJ, United Kingdom

**Table of contents**

|                                           |    |
|-------------------------------------------|----|
| 1. Additional X-ray crystallographic data | S2 |
| 2. Additional SQUID magnetometry data     | S6 |
| 3. Additional cyclic voltammetry data     | S7 |

## 1. Additional X-ray crystallographic data

**Table S1** Crystallographic details for **1–4**.

| Complex                                            | <b>1.</b> (SiMe <sub>4</sub> ) <sub>2</sub>           | <b>2.</b> (C <sub>7</sub> H <sub>8</sub> )                      | <b>3</b>                                                        | <b>4</b>                                                           |
|----------------------------------------------------|-------------------------------------------------------|-----------------------------------------------------------------|-----------------------------------------------------------------|--------------------------------------------------------------------|
| CCDC                                               | 1518413                                               | 1518414                                                         | 1518415                                                         | 1518416                                                            |
| Formula                                            | 2(C <sub>27</sub> H <sub>50</sub> Si <sub>2</sub> Yb) | C <sub>53</sub> H <sub>84</sub> Eu <sub>2</sub> Si <sub>2</sub> | C <sub>46</sub> H <sub>76</sub> Sm <sub>2</sub> Si <sub>2</sub> | C <sub>46</sub> H <sub>45</sub> BF <sub>20</sub> O <sub>3</sub> Yb |
| <i>M<sub>r</sub></i>                               | 603.89                                                | 1081.30                                                         | 985.95                                                          | 1209.67                                                            |
| Crystal System                                     | monoclinic                                            | monoclinic                                                      | triclinic                                                       | monoclinic                                                         |
| Space Group                                        | <i>P</i> 2 <sub>1</sub> / <i>c</i>                    | <i>P</i> 2 <sub>1</sub> / <i>n</i>                              | <i>P</i> -1                                                     | <i>P</i> 2 <sub>1</sub> / <i>c</i>                                 |
| Crystal Morphology                                 | brown block                                           | orange block                                                    | brown needle                                                    | yellow block                                                       |
| <i>a</i> , <i>b</i> , <i>c</i> / Å                 | 13.133(3)<br>17.767(4)<br>13.725(3)                   | 16.8151(6)<br>15.4458(7)<br>20.1800(7)                          | 8.3909(10)<br>11.4240(15)<br>24.064(3)                          | 12.660(3)<br>28.204(6)<br>13.915(3)                                |
| <i>α</i> , <i>β</i> , <i>γ</i> / °                 | 90<br>114.10(3)<br>90                                 | 90<br>99.859(3)<br>90                                           | 94.072(7)<br>94.267(7)<br>92.703(7)                             | 90<br>103.12(3)<br>90                                              |
| Volume / Å <sup>3</sup>                            | 2923.2(10)                                            | 5163.8(4)                                                       | 2291.3(5)                                                       | 4838.8(17)                                                         |
| Temperature / K                                    | 173                                                   | 173                                                             | 100                                                             | 173                                                                |
| <i>Z</i>                                           | 4                                                     | 4                                                               | 2                                                               | 4                                                                  |
| <i>R</i> <sub>int</sub>                            | 0.0821                                                | 0.0715                                                          | 0.1189                                                          | 0.0966                                                             |
| <i>λ</i> / Å                                       | 0.71073                                               | 1.54184                                                         | 0.71073                                                         | 0.71075                                                            |
| <i>θ</i> <sub>max</sub> / °                        | 27.48                                                 | 71.404                                                          | 25.03                                                           | 27.47                                                              |
| <i>R</i> <sub>1</sub> [ <i>I</i> > 2σ( <i>I</i> )] | 0.0464                                                | 0.0533                                                          | 0.0699                                                          | 0.0470                                                             |
| <i>wR</i> <sub>2</sub> (all data)                  | 0.0952                                                | 0.1308                                                          | 0.1492                                                          | 0.0921                                                             |
| <i>Goof</i>                                        | 1.015                                                 | 1.077                                                           | 1.049                                                           | 1.028                                                              |

Ring slippage ( $\Delta$ )

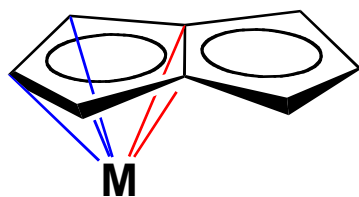

$$\Delta = \Sigma(\text{M-C}_{\text{bridge}})/2 - \Sigma(\text{M-C}_{\text{wing}})/3$$

Fold angle (FA)

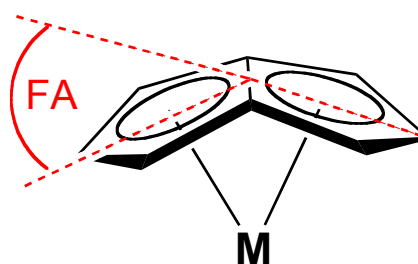

**Figure S1** Definition of geometric parameters  $\Delta$  and FA.

**Table S2.** Short intermolecular contacts (less than the sum of the van der Waals radii,  $\Sigma r_{vdw}$ ) for **1**.(SiMe<sub>4</sub>)<sub>2</sub>.

| Atom1 | Atom2             | Distance / Å | Distance – $\Sigma r_{vdw}$ / Å |
|-------|-------------------|--------------|---------------------------------|
| Yb1   | C31 (TMS solvent) | 2.930        | –0.770                          |

**Table S3.** Short intermolecular contacts (less than the sum of the van der Waals radii) for **2**.(C<sub>7</sub>H<sub>8</sub>).

| Atom1 | Atom2                 | Distance / Å | Distance – $\Sigma r_{vdw}$ / Å |
|-------|-----------------------|--------------|---------------------------------|
| Eu2   | C52 (toluene solvent) | 3.627        | –0.073                          |
| Eu2   | C47 (toluene solvent) | 3.060        | –0.640                          |
| Eu2   | C48 (toluene solvent) | 3.214        | –0.486                          |

**Table S4.** Short intermolecular contacts (less than the sum of the van der Waals radii) for **3**.

| Atom1 | Atom2                               | Distance / Å | Distance – $\Sigma r_{vdw}$ / Å |
|-------|-------------------------------------|--------------|---------------------------------|
| Sm1   | C31 (iPr-CH <sub>3</sub> neighbour) | 3.435        | –0.265                          |
| Sm2   | C37 (iPr-CH <sub>3</sub> neighbour) | 3.394        | –0.306                          |
| C32   | C32                                 | 3.356        | –0.044                          |

**Table S5.** Short intermolecular contacts (less than the sum of the van der Waals radii) for **4**.

| Atom1 | Atom2 | Distance / Å | Distance – $\Sigma r_{vdw}$ / Å |
|-------|-------|--------------|---------------------------------|
| C14   | F20   | 3.167        | –0.003                          |
| C26   | F3    | 3.166        | –0.004                          |
| C27   | F3    | 3.141        | –0.029                          |
| C38   | C39   | 3.303        | –0.097                          |

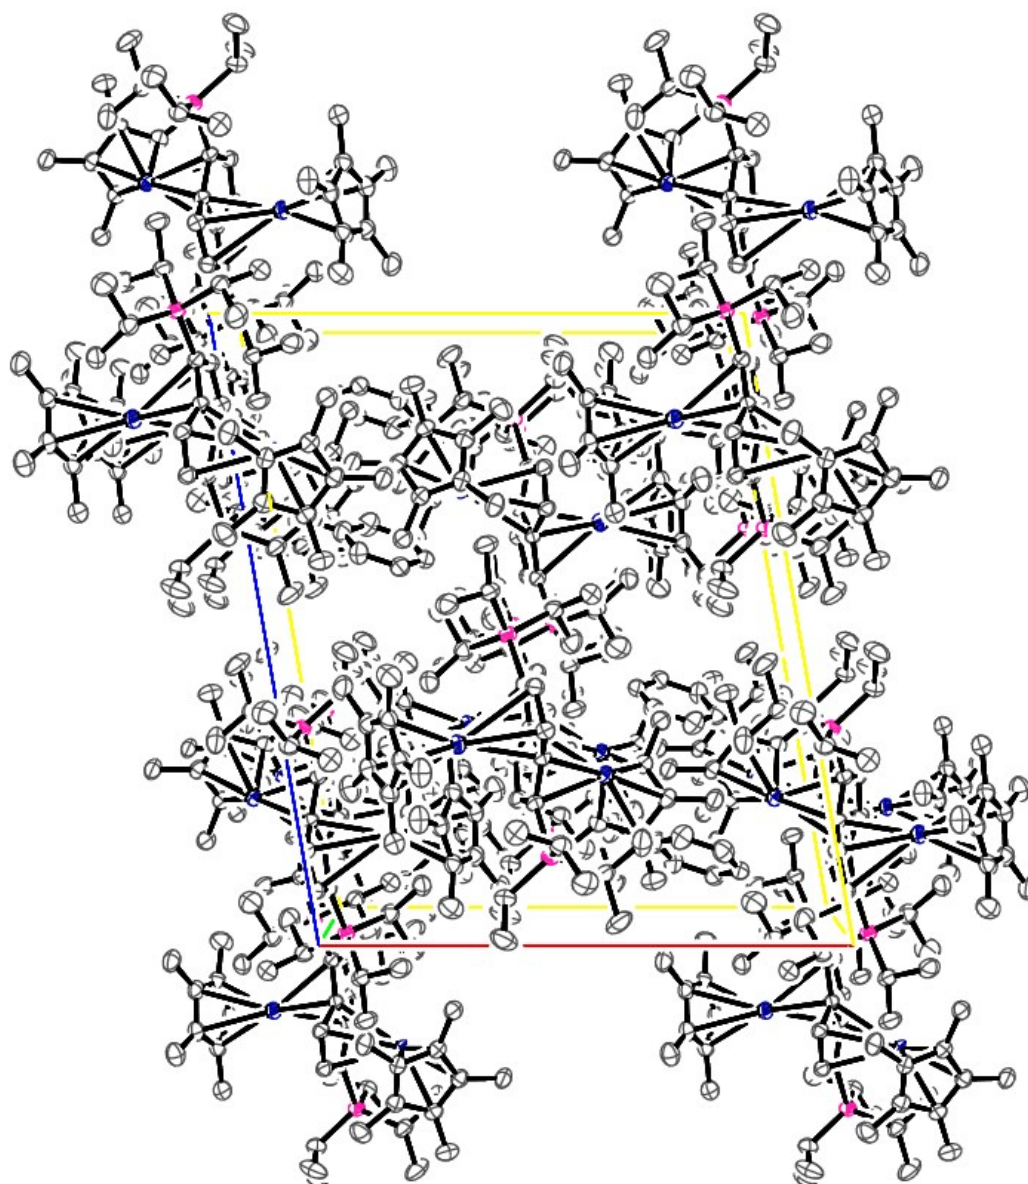

**Figure S2.** ORTEP view of the unit cell of 2.C<sub>7</sub>H<sub>8</sub> (50% ellipsoids).

H atoms and <sup>i</sup>Pr groups removed for clarity.

Crystal data for **5**:  $C_{52}H_{92}KSi_4Yb$ ,  $M_r = 1041.78$ , monoclinic, apparent space group  $P2_1/n$ , green plate,  $a = 14.0303(10) \text{ \AA}$ ,  $b = 35.391(3) \text{ \AA}$ ,  $c = 23.0682(16) \text{ \AA}$ ,  $\alpha = \gamma = 90^\circ$ ,  $\beta = 93.8875(16)^\circ$ ,  $V = 11428(12) \text{ \AA}^3$ .

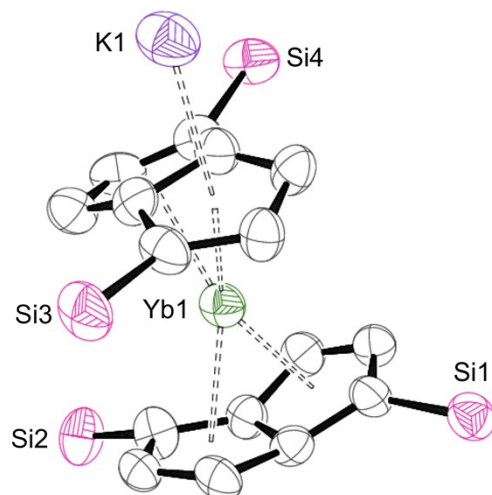

**Figure S3.** Partially refined ( $R_1 = 0.1271$ ) model of **5**.  
H atoms and  $^i\text{Pr}$  groups omitted for clarity.

## 2. Additional SQUID magnetometry data

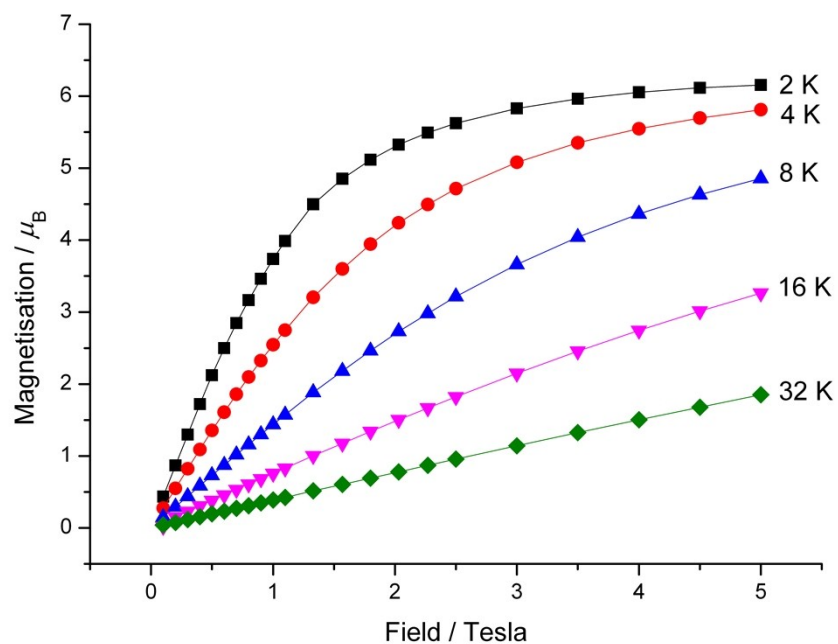

**Figure S4.** Field dependence of the solid state magnetisation for **2**.

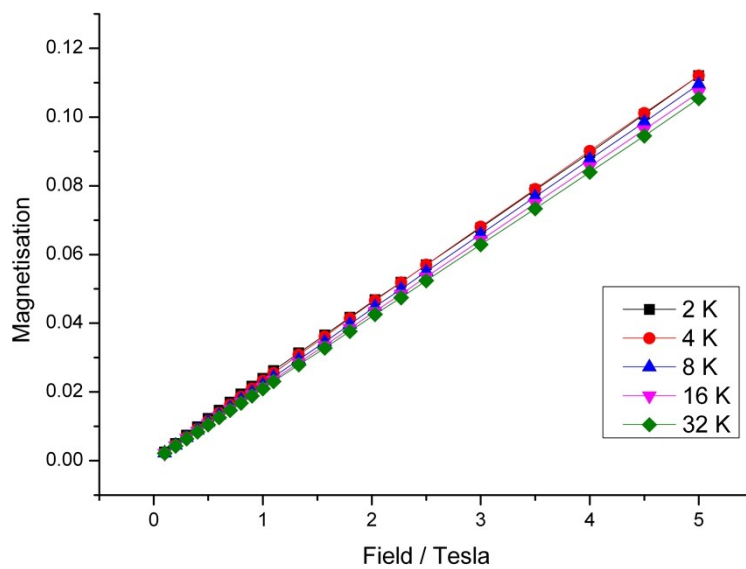

**Figure S5.** Field dependence of the solid state magnetisation for **3**.

### 3. Additional cyclic voltammetry data

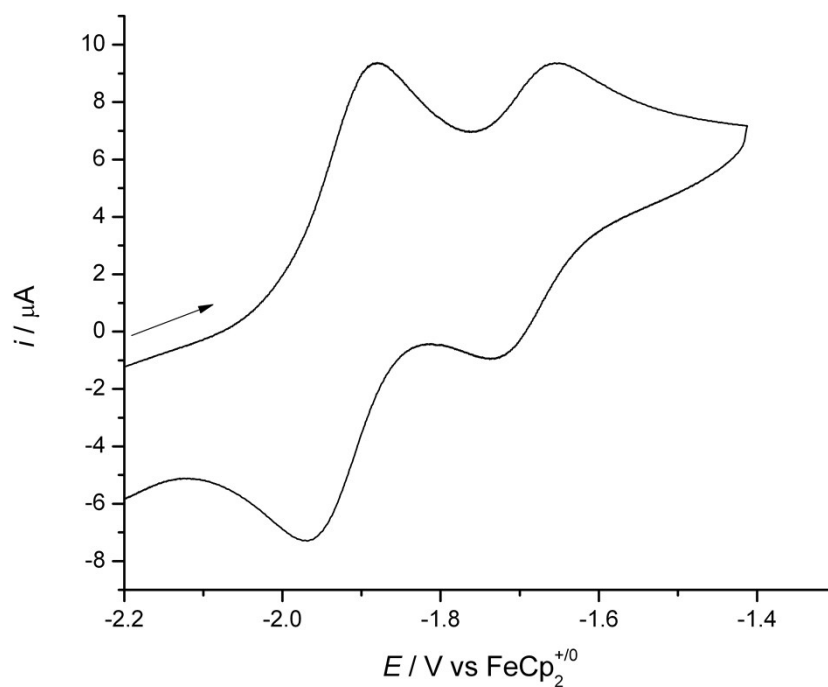

**Figure S6.** CV scan of **1** in MeCN / 0.1 M [ $n\text{Bu}_4\text{N}$ ][PF<sub>6</sub>], scan rate 100 mV s<sup>-1</sup>.

**Table S6.** Peak potentials ( $E_p$  vs FeCp<sub>2</sub><sup>+0</sup>) and limiting currents ( $i_p$ ) for process I of complex **3** in THF / 0.1 M [ $n\text{Bu}_4\text{N}$ ][PF<sub>6</sub>] at scan rate 50 mV s<sup>-1</sup>

| Scan Rate / mV s <sup>-1</sup> | $E_{pa}$ / mV | $E_{pc}$ / mV | $\Delta E_{pp}$ / mV | $i_{pa}$ / $\mu\text{A}$ | $i_{pc}$ / $\mu\text{A}$ | $ i_{pa}/i_{pc} $ |
|--------------------------------|---------------|---------------|----------------------|--------------------------|--------------------------|-------------------|
| 20                             | -16185        | -17295        | 111                  | 0.5521                   | 0.5341                   | 1.03              |
| 50                             | -1593.5       | -1708.5       | 115                  | 1.1292                   | 1.1389                   | 0.99              |
| 100                            | -1581.5       | -1702.5       | 121                  | 1.8097                   | 1.5024                   | 1.20              |
| 200                            | -1579.5       | -1712.5       | 133                  | 2.5364                   | 1.76                     | 1.44              |
| 500                            | -1568.5       | -1731.5       | 163                  | *                        | *                        | *                 |

\*Noise levels too high for accurate peak current determination
